1 **Applied phenomics and genomics for improving barley yellow dwarf resistance in winter**  
2 **wheat**

3

4 Paula Silva<sup>1,2</sup>, Byron Evers<sup>1</sup>, Alexandria Kieffaber<sup>1</sup>, Xu Wang<sup>3</sup>, Richard Brown<sup>1</sup>, Liangliang  
5 Gao<sup>1</sup>, Allan Fritz<sup>4</sup>, Jared Crain<sup>1</sup>, Jesse Poland<sup>1,5,§</sup>

6

7 <sup>1</sup> Department of Plant Pathology, College of Agriculture, Kansas State University, Manhattan,  
8 Kansas, 66506

9 <sup>2</sup> Programa Nacional de Cultivos de Secano, Instituto Nacional de Investigación Agropecuaria  
10 (INIA), Estación Experimental La Estanzuela, Colonia, Uruguay, 70006

11 <sup>3</sup> Department of Agricultural and Biological Engineering, University of Florida, IFAS Gulf Coast  
12 Research and Education Center, Wimauma, Florida, 33598

13 <sup>4</sup> Department of Agronomy, College of Agriculture, Kansas State University, Manhattan, Kansas,  
14 66506

15 <sup>5</sup> King Abdullah University of Science and Technology, Thuwal, Saudi Arabia

16 § corresponding author: [jpoland@ksu.edu](mailto:jpoland@ksu.edu), [jesse.poland@kaust.edu.sa](mailto:jesse.poland@kaust.edu.sa)

17

18 **ORCID**

19 Paula Silva: 0000-0003-2655-2949

20 Byron Evers: 0000-0003-1840-5842

21 Xu Wang: 0000-0002-7144-6865

22 Liangliang Gao: 0000-0002-8562-0027

23 Allan Fritz: 0000-0003-2574-8675

24 Jared Crain: 0000-0001-9484-8325

25 Jesse Poland: 0000-0002-7856-1399

26

27 Running title – Phenomics and genomics for BYD

28

29 Keywords: Barley yellow dwarf (BYD), High-throughput Phenotyping (HTP), *Triticum*

30 *aestivum*, Virus, Resistance, Tolerance, Genome-wide Association Mapping (GWAS), Genomic

31 Selection (GS)

32

33 **Abstract**

34 Barley yellow dwarf (BYD) is one of the major viral diseases of cereals. Phenotyping BYD in  
35 wheat is extremely challenging due to similarities to other biotic and abiotic stresses. Breeding  
36 for resistance is additionally challenging as the wheat primary germplasm pool lacks genetic  
37 resistance, with most of the few resistance genes named to date originating from a wild relative  
38 species. The objectives of this study were to, i) evaluate the use of high-throughput phenotyping  
39 (HTP) from unmanned aerial systems to improve BYD assessment and selection, ii) identify  
40 genomic regions associated with BYD resistance, and iii) evaluate genomic prediction models  
41 ability to predict BYD resistance. Up to 107 wheat lines were phenotyped during each of five  
42 field seasons under both insecticide treated and untreated plots. Across all seasons, BYD  
43 severity was lower with the insecticide treatment and plant height (PHTM) and grain yield  
44 (GY) showed increased values relative to untreated entries. Only 9.2% of the lines were positive  
45 for the presence of the translocated segment carrying resistance gene *Bdv2* on chromosome 7DL.  
46 Despite the low frequency, this region was identified through association mapping. Furthermore,  
47 we mapped a potentially novel genomic region for resistance on chromosome 5AS. Given the  
48 variable heritability of the trait (0.211 – 0.806), we obtained relatively good predictive ability for  
49 BYD severity ranging between 0.06 – 0.26. Including *Bdv2* on the predictive model had a large  
50 effect for predicting BYD but almost no effect for PHTM and GY. This study was the first  
51 attempt to characterize BYD using field-HTP and apply GS to predict the disease severity.  
52 These methods have the potential to improve BYD characterization and identifying new sources  
53 of resistance will be crucial for delivering BYD resistant germplasm.

## 54 **Introduction**

55 Wheat (*Triticum aestivum* L.) is one of the most essential food crops in the world and is  
56 constantly threatened by several biotic stresses (Savary *et al.* 2019). Among the most important  
57 viral stresses is barley yellow dwarf (BYD). This disease is widespread across the world, caused  
58 by viruses and transmitted by aphids (Shah *et al.* 2012), and can cause significant yield  
59 reductions in susceptible cultivars. In Kansas, BYD is the fourth most significant wheat disease  
60 in terms of average estimated yield losses with an average yield loss of approximately 1%  
61 estimated over the past 20 years (Hollandbeck *et al.* 2019), equivalent to a loss of more than \$10  
62 million per year. However, yield losses are highly variable ranging from 5% to 80% in a single  
63 field depending on the environment, management practices, the host, and the genetic  
64 background, (Miller and Rasochová 1997; Perry *et al.* 2000; Gaunce and Bockus 2015).  
65 Moreover, the wide host range and the complex lifestyle of its vectors make BYD extremely  
66 difficult to manage, and different management strategies (e.g., planting date and control of vector  
67 populations) are inconsistent depending on climate and location (Bockus *et al.* 2016). Thus, in  
68 many production environments, particularly in the Central and Eastern regions of Kansas, BYD  
69 is often the most economically impactful disease.

70

71 Barley yellow dwarf disease symptoms are highly variable depending on the crop, variety, time,  
72 and developmental stage when the infection occurs, aphid pressure, and environmental  
73 conditions (Shah *et al.* 2012; Choudhury *et al.* 2019b). BYD characterization in the field is  
74 extremely challenging as the symptoms can easily be confused with other viral disease  
75 symptoms such as wheat streak mosaic virus symptoms, nutrient deficiencies, or environmental  
76 stresses like waterlogging (Shah *et al.* 2012). Typical BYD symptoms can be observed at all  
77 levels of plant organization – leaf, roots, and flowers. Leaf discoloration in shades of yellow,  
78 red, or purple, specifically starting at the tip of the leaf and spreading from the margins toward  
79 the base is common as well as a reduction in chlorophyll content (Jensen and Van Sambeek  
80 1972; D'arcy 1995). Often the entire plant visually appears stunted or dwarfed from a reduction  
81 in biomass by reducing tiller numbers. Spike grain yield is decreased through a reduction in  
82 kernels per spike and kernel weight which also affects grain quality (Riedell *et al.* 2003;  
83 Choudhury *et al.* 2019b). Quality can be further reduced by a reduction in starch content (Peiris

84 *et al.* 2019). Below ground effects of BYD have also been reported including reduced root  
85 growth (Riedell *et al.* 2003).

86  
87 Currently, there is no simple solution to control BYD (Walls *et al.* 2019), however, the use of  
88 genetic resistance and tolerance is the most appealing and cost-effective option to control this  
89 disease (Comeau and Haber 2002; Choudhury *et al.* 2017; 2019b). Resistance and tolerance  
90 could be different genetic mechanisms, namely stopping virus replication and minimizing  
91 disease symptoms respectively, but within this paper all mention of resistance includes both  
92 genetic resistance and tolerance. Breeding strategies involving genetic resistance can target  
93 either the aphids or the virus. Resistance to aphids can be achieved by three different strategies,  
94 antixenosis, antibiosis, or tolerance (Girvin *et al.* 2017). To date, most breeding efforts have  
95 been directed to the identification of viral tolerance, also known as ‘field resistance’, that refers  
96 to the ability of the plant to yield under BYD infection and is associated with a reduction of  
97 symptoms of infection independent of the virus titer (Foresman *et al.* 2016). Field resistance has  
98 been reported to be polygenic, falling under the quantitative resistance class, where several genes  
99 with very small effects control the resistance response (Qualset *et al.* 1973, Cisar *et al.* 1982;  
100 Ayala *et al.* 2002; Choudhury *et al.* 2019a; c).

101  
102 Presently, no major gene conferring immunity or a strong resistant phenotype to BYD has been  
103 identified in bread wheat, and only four resistance genes have been described for BYD. Located  
104 on chromosome 7DS, *Bdv1* is the only gene described from the primary pool of wheat and was  
105 originally identified in the wheat cultivar ‘Anza’ (Qualset *et al.* 1984; Singh *et al.* 1993). This  
106 gene provides resistance to some but not all the viruses that cause BYD (Ayala-Navarrete and  
107 Larkin 2011). The other three named genes were all introduced into wheat through wide  
108 crossing from intermediate wheatgrass (*Thinopyrum intermedium*) (Ayala *et al.* 2001; Zhang *et al.*  
109 *et al.* 2009). *Bdv2* and *Bdv3* are both located on a translocation segment on wheat chromosome  
110 7DL (Brettell *et al.* 1988; Sharma *et al.* 1995), while *Bdv4* is located on a translocation segment  
111 on chromosome 2D (Larkin *et al.* 1995; Lin *et al.* 2007). *Bdv2* was the first gene successfully  
112 introgressed in wheat breeding programs from the tertiary gene pool for BYD resistance (Banks  
113 *et al.* 1995) and deployed into varieties.

114

115 In addition to the four known resistance genes, other genomic regions associated with BYD  
116 resistance have been identified through genetic mapping. These regions have been described on  
117 nearly all wheat chromosomes but have not been genetically characterized (Ayala *et al.* 2002;  
118 Jarošová *et al.* 2016; Choudhury *et al.* 2019a; b; c). Moreover, two recent studies have reported  
119 that some of these new genomic regions display additive effects (Choudhury *et al.* 2019a; b).  
120 Additive genetic effects had already been reported in lines combining *Bdv2* and *Bdv4* (Jahier *et*  
121 *al.* 2009).

122  
123 Taken together, research indicates that resistance genes to BYD in wheat are rare. With a lack of  
124 major genes and difficulty to characterize resistance in the wheat pool likely due to the polygenic  
125 nature of many small effect loci, identifying resistance has been limited. Nevertheless, breeding  
126 programs have devoted large efforts for breeding BYD resistance due to the economic  
127 importance of this disease, with some of the greatest success coming from wide crosses to the  
128 tertiary gene pool.

129  
130 Breeding for BYD resistance can be improved by applying strategies for more effective  
131 evaluation and utilization of the identified resistance. To get a better understanding of BYD and  
132 its quantitative nature, consistent and high-throughput methods are needed for the identification  
133 of resistant wheat lines for large-scale selection in breeding programs (Aradottir and Crespo-  
134 Herrera 2021). Effective selection on the quantitative resistance with low heritability can be  
135 aided by the high-throughput genotyping, high-throughput phenotyping (HTP), or a combination  
136 of both.

137  
138 Access to high-density genetic markers at a very low-cost, owing to the rapid developments in  
139 DNA sequencing, have enabled breeding programs to apply molecular breeding for quantitative  
140 traits. Genomic selection (GS) is a powerful tool to breed for quantitative traits with complex  
141 genetic architecture and low heritability (e.g., yield, quality, and diseases such as Fusarium head  
142 blight), because it has greater power to capture loci with small effect compared with other  
143 marker-assisted selection strategies (Meuwissen *et al.* 2001; Poland and Rutkoski 2016). In  
144 addition to molecular data, HTP using unmanned aerial systems (UAS), or ground-based sensors  
145 is providing high density phenotypic data that can be incorporated into breeding programs to

146 increase genetic gain (Haghighattalab *et al.* 2016; Crain *et al.* 2018; Wang *et al.* 2020). Using  
147 precision phenotyping for disease scoring can improve the capacity for rapid and non-biased  
148 evaluation of large field-scale numbers of entries (Poland and Nelson 2011). Taken together  
149 improvements in genomics and phenomics have the potential to aid breeding progress for BYD  
150 resistance.

151  
152 In an effort to accelerate the development of resistant lines, we combined high throughput  
153 genotyping and phenotyping to assess BYD severity in a large panel of elite wheat lines. We  
154 evaluated the potential of HTP data to accurately assess BYD severity as well as identify genetic  
155 regions associated with BYD resistance and inform whole genome prediction to identify resistant  
156 lines.

157

## 158 **Materials and Methods**

159

### 160 **Plant Material**

161 A total of 381 different wheat genotypes were characterized for BYD resistance, including 30  
162 wheat cultivars and 351 advanced breeding lines in field nurseries over five years (Table S1). In  
163 each nursery, an unbalanced set of 52 – 107 wheat entries were evaluated including both  
164 cultivars and breeding lines (Table 1). The BYD susceptible cultivar ‘Art’ and BYD resistant  
165 cultivar ‘Everest’ were included in all the nurseries (seasons) as checks.

166

### 167 **Field Experiments**

168 Nurseries for BYD field-screening were conducted during five consecutive wheat seasons (2015  
169 – 2016 to 2019 – 2020) (Table 1). Seasons 2015 – 16 and 2016 – 17 were conducted at Kansas  
170 State University (KSU) Rocky Ford experimental station (39°13'45.60" N, 96°34'41.21" W),  
171 while the 2017 – 18, 2018 – 19, and 2019 – 20 nurseries were planted at KSU Ashland Bottoms  
172 experimental station (39°07'53.76" N, 96°37'05.20" W). The nurseries were established for  
173 natural infections by planting about three weeks earlier than the normal planting window in mid-  
174 September. The susceptible cultivar ‘Art’ was planted as a spreader plot in the borders and as a  
175 control check plot also with the resistant cultivar ‘Everest’. The experimental unit was 1.5m ×  
176 2.4m with a six-row plot on 20cm row spacing.

177

178 A split-plot field design with two or three replications was used where the main plot was  
179 insecticide treatment, and the split plot was the wheat genotype. Three replications were used  
180 for proof of concept during the first two seasons but then two replications were chosen as a  
181 balance of space and number of entries for the following seasons. For the treated replications the  
182 seed were treated at planting with Gaucho XT (combination of insecticide and fungicide) at a  
183 rate of 0.22 ml/100g of seed, followed with foliar insecticide applications starting from  
184 approximately 2 – 3 weeks after planting through heading. Depending on field conditions, spray  
185 treatments were conducted every 14 – 21 days if average air temperatures remained above 10°C.  
186 Foliar insecticides were applied to the treated replications in a spray volume of 280.5 L/ha using  
187 a Bowman MudMaster plot sprayer equipped with TeeJet Turbo TwinJet tips. Insecticide  
188 applications consisted of a rotation of Warrior II, Lorsban, and Mustang Max at rates of  
189 0.14L/ha, 1.17L/ha, and 0.29L/ha, respectively. For the control insecticide treatment (untreated),  
190 the seed were treated with Raxil MD (fungicide) at a rate of 0.28ml/100g of seed, and no foliar  
191 insecticide applications were applied. Foliar fungicide Nexicor was applied to the whole  
192 experiment at a rate of 0.73L/ha, at both planting and heading, to control all other diseases so the  
193 main disease pressure was focused on BYD.

194

### 195 **Phenotypic Data**

196 Individual plots were assessed for i) BYD severity characterized as the typical visual symptoms  
197 of yellowing or purpling on leaves using a 0 – 100% visual scale, determined directly after spike  
198 emergence by recording the proportion of the plot exhibiting the symptoms (Table 1), ii) manual  
199 plant height (PTHT<sub>M</sub>, meters), and iii) grain yield (GY, tons/ha). Experimental plots were  
200 harvested using a Kincaid 8XP plot combine (Kincaid Manufacturing., Haven, KS, USA). Grain  
201 weight, grain moisture and test weight measurements for each plot was recorded using a Harvest  
202 Master Classic GrainGage and Mirus harvest software (Juniper Systems, Logan, UT, USA).  
203 Visual phenotypic assessment was recorded using the Field Book phenoapp (Rife and Poland  
204 2014).

205



## 206 **High-Throughput Phenotyping**

207 To compliment the manually recorded phenotypic data, we applied HTP using a ground-based  
208 proximal sensing platform or an UAS (Table 2). Seasons 2015 – 16 and 2016 – 17 were  
209 characterized by the ground platform as described in Barker *et al.* (2016) and Wang *et al.* (2018).  
210 For the other three seasons, we used a quadcopter DJI Matrice 100 (DJI, Shenzhen, China)  
211 carrying a MicaSense RedEdge-M multispectral camera (MicaSense Inc., United States). The  
212 HTP data was collected on multiple dates throughout the growth cycle from stem elongation to  
213 ripening (GS 30 – 90; Zadoks *et al.* 1974) (Table 2). Flight plans were created using CSIRO  
214 mission planner application and missions were executed using the Litchi Mobile App (VC  
215 Technology Ltd., UK, <https://uavmissionplanner.netlify.app/>) for DJI Matrice100. The aerial  
216 image overlap rate between two geospatially adjacent images was set to 80% both sequentially  
217 and laterally to ensure optimal orthomosaic photo stitching quality. All UAS flights were set at  
218 20m above ground level at 2m/s and conducted within two hours of solar noon. To improve the  
219 geospatial accuracy of orthomosaic images, white square tiles with a dimension of 0.30m ×  
220 0.30m were used as ground control points and uniformly distributed in the field experiment  
221 before image acquisition and surveyed to cm-level resolution using the Emlid REACH RS+  
222 Real-Time Kinematic Global Navigation Satellite System unit (Emlid Ltd., HongKong, China).

223

224 An automated image processing pipeline (Wang *et al.* 2020) was used to generate the  
225 orthomosaics and extract plot-level plant height (PTHT<sub>D</sub> (m), Singh *et al.* 2019) and the  
226 normalized difference vegetation index (NDVI) (Rouse *et al.* 1974), calculated as:

227

$$228 \text{NDVI} = \frac{\text{NIR}-\text{Red}}{\text{NIR}+\text{Red}} \quad [\text{Eq. 1}]$$

229

230 where NIR and Red are the near-infrared and red bands of the multispectral images and NDVI is  
231 the output image. Both traits were selected based on potential BYD characterization where the  
232 most typical BYD symptoms include chlorosis and stunting of the plants, thus, influencing  
233 NDVI and PTHT.

234

## 235 **Statistical Data Analyses**

236 First, the adjusted mean best linear unbiased estimator (BLUE) was calculated for each entry for  
237 all the different traits for each season (Table S1), using the following model:

238

$$239 \quad y_{ijklm} = \mu + G_i + T_j + GT_{ij} + R_{k(j)} + B_{l(kj)} + C_{m(kj)} + e_{ijklm} \quad [\text{Eq. 2}]$$

240

241 where  $y_{ijklm}$  is the phenotype for the trait of interest,  $\mu$  is the overall mean,  $G_i$  is the fixed effect  
242 of the  $i^{th}$  entry (genotype),  $T_j$  is the fixed effect of the  $j^{th}$  insecticide treatment,  $GT_{ij}$  is the fixed  
243 effect of the interaction between the  $i^{th}$  entry and the  $j^{th}$  insecticide treatment (genotype by  
244 treatment effect),  $R_{k(j)}$  is the random effect of the  $k^{th}$  replication nested within the  $j^{th}$   
245 insecticide treatment and distributed as iid  $R_{k(j)} \sim N(0, \sigma_R^2)$ ,  $B_{l(kj)}$  is the random effect of the  
246  $l^{th}$  row nested within the  $k^{th}$  replication and  $j^{th}$  treatment distributed as iid  $B_{l(kj)} \sim N(0, \sigma_B^2)$ ,  
247  $C_{m(kj)}$  is the random effect of the  $m^{th}$  column nested within the  $k^{th}$  replication and  $j^{th}$  treatment  
248 and assumed distributed as iid  $C_{m(kj)} \sim N(0, \sigma_C^2)$ , and  $e_{ijklm}$  is the residual for the  $ijklm^{th}$  plot  
249 and distributed as iid  $e_{ijklm} \sim N(0, \sigma_e^2)$ . The ‘lme4’ R package (Bates *et al.* 2014) was used for  
250 fitting the models.

251

252 The BLUEs were used to inspect trait distributions and to calculate Pearson correlations between  
253 all traits. In addition, BLUE values were used to calculate the reduction in GY for each entry as  
254 the difference of GY between the untreated and insecticide treated main plots. This variable  
255 reflects the level of BYD resistance of each entry, and it was used to perform GWAS and GS  
256 analyses.

257

258 For NDVI and PTHT<sub>D</sub>, the plot-level observed values extracted for the different phenotypic dates  
259 were fitted to a logistic non-linear regression model (Fox and Weisberg 2011) as,

260

$$261 \quad y = \frac{\theta_1}{1 + e^{-(\theta_2 + \theta_3 x)}} + \varepsilon \quad [\text{Eq. 3}]$$

262

263 where is  $y$  the phenotype for the trait of interest at the time-point  $x$  measured as days after  
264 January 1,  $\theta_1$  is the maximum value (upper asymptote) represented by the final PTHT or  
265 maximum achieved NDVI,  $\theta_2$  is the inflection point that represents the greatest rate of change in  
266 the growth curve, either senescence for NDVI or height of growth,  $\theta_3$  is the lag phase or onset of  
267 senescence or growth rate from time  $x$  where  $x$  is the calendar day of the year since January 1,  
268 and  $\varepsilon$  is the residual error (Figure S1). The “nlme” R package was used for model fitting  
269 (Pinheiro *et al.* 2015). The model parameters obtained for each trait ( $\theta_{1NDVI}$ ,  $\theta_{2NDVI}$ ,  $\theta_{3NDVI}$ ,  
270  $\theta_{1PTHT_D}$ ,  $\theta_{2PTHT_D}$ , and  $\theta_{3PTHT_D}$ ) were used in addition to the other phenotypic traits to calculate  
271 BLUEs, distributions, correlations, and BLUPs.

272  
273 Secondly, we used a mixed linear model to calculate the best linear unbiased predictors (BLUPs)  
274 for each entry in each nursery (season) (Table S1), using the same model as described in  
275 equation 2 but defining  $G_i$ ,  $T_j$ , and  $GT_{ij}$  as random effects. BLUPs were used because of the  
276 unbalanced nature of the data (not all lines were evaluated in all the seasons). The BLUPs  
277 calculated for each season were then combined for GWAS and GS. Furthermore, we calculated  
278 broad-sense heritability on a line-mean basis by splitting the data based on whole plot treatment  
279 for insecticide treatments as:

$$280 \quad H^2 = \frac{\sigma_G^2}{\sigma_G^2 + \frac{\sigma_e^2}{r}} \quad [\text{Eq. 4}]$$

282  
283 where  $\sigma_G^2$  is the genotypic variance,  $\sigma_e^2$  is the residual error variance, and  $r$  is the number of  
284 replications.

## 285 286 **Genotypic Data**

287 A total of 346 wheat entries were genotyped using genotyping-by-sequencing (GBS) (Poland *et al.*  
288 *et al.* 2012) and sequenced on an Illumina Hi Seq2000. Single nucleotide polymorphisms (SNPs)  
289 were called using Tassel GBSv2 pipeline (Glaubitz *et al.* 2014) and anchored to the Chinese  
290 Spring genome assembly v1.0 (Appels *et al.* 2018). SNP markers with minor allele frequency <  
291 0.01, missing data > 85%, or heterozygosity > 15% were removed from the analysis. After  
292 filtering, we retained 29,480 SNPs markers that were used to investigate the population structure

293 through principal component analysis (PCA), genome-wide association analysis (GWAS), and  
294 GS. In addition, GBS data was used to run a bioinformatics pipeline to predict the presence or  
295 absence of the translocated segment on chromomere 7DL carrying the *Bdv2* gene for each entry  
296 (Table S1). The prediction was done based on a modified alien predict pipeline (Gao *et al.*  
297 2021). Briefly, alien or wheat specific tags were counted in the 7DL region and tabulated using  
298 a training set of cultivars or lines that are known to be *Bdv2* positive and negative. A simple  
299 classification was done based on alien to wheat tag counts ratios.

300

### 301 **Genome-Wide Association Analysis**

302 The GWAS analysis was performed with a mixed linear model implemented in the ‘GAPIT’ R  
303 package (Lipka *et al.* 2012) that includes principal components to account for population  
304 structure as fixed effects and the individuals to explain familial relatedness as random effects,  
305

306

$$306 \quad y = X\beta + Zu_i + e \quad \text{[Eq. 5]}$$

307

308 where  $y$  is the vector of phenotypic BLUPs,  $X$  and  $Z$  are the incidence matrix of  $\beta$  and  $u_i$ ,  
309 respectively, with  $u_i$  assumed  $\sim N(0, 2K_i\sigma_i^2)$  where  $K$  is the individual kinship matrix, and  $e$  is  
310 the vector of random residual effects with  $\sim N(0, I\sigma_e^2)$ , where  $I$  is the identity matrix and  $\sigma_e^2$  is  
311 the unknown residual variance. The false discovery rate correction with an experimental  
312 significance level value of 0.01 was used to assess marker-trait associations. Manhattan plots  
313 were generated with ‘CMplot’ package in R software (Yin 2020). PCA using GBS-SNPs was  
314 performed in R language. Eigenvalues and eigenvectors were computed with ‘e’ function using  
315 ‘A.mat’ function and the ‘mean’ imputation method of ‘rrBLUP’ package (Endelman, 2011). To  
316 declare a quantitative trait locus (QTL) we considered only the regions having several SNP  
317 markers in linkage disequilibrium, clearly showing a peak. We did not consider regions with a  
318 single SNP above the significant threshold as a QTL.

319

### 320 **Genomic Selection**

321 Using data from the five seasons, GS models using the genomic best linear unbiased predictor  
322 (G-BLUP) were developed to assess predictive ability. A five-fold cross-validation method was  
323 used to assess model accuracy where the data set was split into five sets based on season, with

324 four seasons forming the training set and the fifth season serving as prediction set. This process  
325 was repeated until all seasons were predicted. Along with predicting all other seasons from each  
326 season, a model was evaluated with a leave-two-out cross-validation strategy. This strategy was  
327 used to get a better mix of years with and without disease incidence, where the training  
328 population consisted of three seasons, and the remaining two seasons were predicted from the  
329 combined training population. The GS model was fitted with the training population using  
330 ‘rrBLUP’ *kin.blup* function (Endelman 2011), the GS model equation was,

$$331$$
$$332 \quad y = Wg + \varepsilon \quad \text{[Eq. 6]}$$
$$333$$

334 where  $y$  is a vector of phenotypic BLUPs,  $W$  is the design matrix of  $g$ ,  $g$  is the vector of  
335 genotypic values  $\sim N(0, K\sigma_g^2)$  and  $\varepsilon$  is the vector of residual errors (Endelman 2011).

336 Predictive ability was assessed using Pearson’s correlation ( $r$ ) between the predicted value (G-  
337 BLUP) and the BLUP for the respective phenotype. In addition, for both GS strategies we also  
338 tested the effect of adding the genotype of the *Bdv2* loci as a fixed effect cofactor, using the  
339 model,

$$340$$
$$341 \quad y = \mu + X\beta + Wg + \varepsilon \quad \text{[Eq. 7]}$$
$$342$$

343 which combines parameters described in equation 6 and  $X$  is the matrix ( $n \times 1$ ) of individual  
344 observation for presence or absence of *Bdv2* and  $\beta$  is the fixed effect for the *Bdv2* measurements.

345

## 346 **Results**

347

### 348 **Phenotypic Data**

349 We analyzed five years of BYD field-screening nurseries (seasons 2015-16 to 2019-20)  
350 characterizing a total of 381 wheat lines. The disease pressure and the expression of BYD  
351 associated symptoms varied each season, however, we were able to observe a significant effect  
352 of the insecticide treatment in all seasons (Figure 1). Across all seasons, BYD symptoms were  
353 lower on the insecticide treated plots and both PHT<sub>M</sub> and GY increased compared to the non-  
354 treated control. Season 2016-17 had the most conducive conditions for BYD screening, resulting

355 in high average severity and a larger difference between mean values for the treated vs untreated  
356 plots for all the collected traits (Figure 1). There was general consistency in order across all  
357 seasons with the susceptible check ‘Art’ ranked among the highest in BYD severity (Figure S2).

358  
359 Phenotypic correlations between the traits showed a negative correlation between BYD and GY  
360 for all the seasons and a negative or no correlation between BYD and  $PTHT_M$  (Figure S3). The  
361 same correlation trends were observed under insecticide treated and untreated plots. Broad-sense  
362 heritability was moderate to high for all the traits, ranging between 0.21 and 0.79 for the  
363 insecticide treated plots and between 0.41 and 0.84 for the untreated plots. Across all traits, the  
364 untreated insecticide replications showed higher  $H^2$  values, with season 2016 – 17 showing the  
365 highest values (Figure 2).

366  
367 For the HTP data collected (Table 2), we obtained three different parameters ( $\theta_1$ ,  $\theta_2$ , and  $\theta_3$ ) for  
368 both  $PTHT_D$  and NDVI after fitting a logistic regression model using the data collected during  
369 the experiments (2015-16 season data was not included due to lack of data quality) (Figure S1).

370 Correlations between these parameters and the phenotypic traits collected manually were  
371 different for all the traits (Figure S3). For the insecticide untreated plots, BYD resulted in a  
372 negative correlation with  $\theta_{2NDVI}$  and a positive correlation with  $\theta_{3NDVI}$ , in most of the field  
373 seasons. We did not find a clear correlation pattern between BYD and  $PTHT_D$ . For  $PTHT_M$  we  
374 detected a positive correlation with  $\theta_{1PTHT_D}$  across all seasons, and for GY we observed a  
375 positive correlation with  $\theta_{1NDVI}$  and  $\theta_{2NDVI}$ , and a negative correlation with  $\theta_{3NDVI}$  (Figure S3).

376

### 377 **Prediction of *Bdv2* Resistance Gene**

378 We used GBS data to genotype the *Bdv2* resistance gene located on a translocation segment from  
379 intermediate wheatgrass on chromosome 7DL of bread wheat. In total, 33 of the 346 wheat lines  
380 carried the *Th. intermedium* chromosomal translocation with *Bdv2* (Table S1). Interestingly, 28  
381 of these *Bdv2* lines belonged to the same breeding cycle, entering the advanced yield nursery  
382 stage of the KSU breeding program in the 2017 – 18 season. Furthermore, only 7 pedigrees are  
383 represented within the 28 *Bdv2* entries, meaning that these lines are highly related. The  
384 remaining 5 *Bdv2* lines were distributed in 2015 – 16 (n=3), 2018 – 19 (n=1), and 2019 – 20  
385 (n=1), and none of the lines from the season 2016 – 17 had the presence of *Bdv2* (Table S1).

386

## 387 **Population Structure**

388 We studied the population structure of 346 wheat lines using 29,480 GBS-derived SNP markers.  
389 The PCA did not reveal a strong pattern of population structure (Figure 3). Moreover, the  
390 variation explained by the first two principal components (4 and 3%, respectively) also supports  
391 the hypothesis of minimal population structure within a single breeding program. We observed  
392 that most of the wheat cultivars released by KSU breeding program were located outside the  
393 cluster grouping all the breeding lines (Figure 3A). Lines with the presence of *Bdv2* clustered  
394 together (Figure 3B), likely due to a related pedigree to the original source, and we did not  
395 identify any evident pattern for BYD severity associated with the population structure (Figure  
396 3C).

397

## 398 **Genome-Wide Association Analysis**

399 To investigate the genetic architecture of BYD we performed GWAS analyses for all collected  
400 traits using the BLUP values for 346 lines and 29,480 SNP markers. The first two principal  
401 components from PCA and the kinship matrix were included in the mixed model to account for  
402 population structure and genetic relatedness. We found significant marker-trait associations for  
403 BYD severity on chromosomes 5AS, 7AL, and 7DL (Figure 4A). The highest peak was  
404 observed on the proximal end of chromosome 7DL, located at 571 Mbp – 637 Mbp. To test the  
405 hypothesis that this association was explained by the resistance gene *Bdv2* (located on  
406 chromosome 7DL), we investigated the haplotypes defined by the 16 SNP markers associated  
407 with BYD severity and were able to identify two haplotypes that exactly matched the presence or  
408 absence of *Bdv2* (Fig 4A). This same region was mapped using BYD severity and the presence  
409 or absence of *Bdv2* as a fixed covariate (Figure 4B). This analysis (Figure 4B) also detected a  
410 peak on chromosome 7AL. Lastly, we explored the effect of *Bdv2* on both BYD BLUEs and  
411 BLUPs, and we observed that the presence of *Bdv2* had a positive effect in reducing the disease  
412 severity by approximately 10% (Figure 5A). The significant peak on chromosome 5AS, located  
413 at 46 Mbp – 103 Mbp, was explained by 10 SNP markers, comprising two main haplotypes, one  
414 of them associated with reduced BYD severity (Fig 5B). When we combined the different 5AS  
415 haplotypes with *Bdv2*, we observed that the presence of *Bdv2* had a positive effect, reducing the  
416 levels of BYD when combined with both 5AS haplotypes (Figure 5C), and suggesting an

417 additive effect. Compared to the associations found for *Bdv2* (Fig 4B), we did not find any  
418 strong evidence of marker trait associations for the other evaluated traits (Figure S4).

419

## 420 **Genomic Selection**

421 To evaluate the potential of GS to predict BYD disease severity, we fit several GS models to the  
422 phenotypic BLUPs of BYD, PTH<sub>M</sub>, and reduction in GY. Across all traits, to determine  
423 predictive ability we used a five-fold cross validation where prediction ability ranged from -0.08-  
424 0.26. There was relatively good predictive ability for BYD severity ranging between 0.06 –  
425 0.26, in comparison with PTHT<sub>M</sub> and reduction in GY resulting in a lower range from 0.02 – 0.17  
426 and -0.08 – 0.2, respectively (Figure 6). Evaluating the conformation of the training population,  
427 we observed that when including 2016-17 season, prediction abilities were the highest for BYD  
428 but the lowest for the other two traits, implying that season 2016 – 17 was either a good season  
429 to train the prediction models or a difficult season to predict based on available data.

430

431 To further investigate the power of GS, we developed models using a leave-two-out strategy,  
432 where two seasons were excluded from the training population and used as the testing  
433 population. We fitted GS models for all possible two-season combinations. This strategy  
434 resulted in slightly smaller training populations which decreased overall predictive ability  
435 (Figure 6). This result was evident for BYD predictions where excluding two seasons had a larger  
436 negative impact.

437

438 Lastly, we evaluated the effect of adding information about the genotype of the *Bdv2* resistance  
439 gene as a phenotypic fixed covariate into the GS models. There were differences in the effect of  
440 *Bdv2* on the predictive ability across BYD severity, PTHT<sub>M</sub>, and GY, showing a large effect for  
441 predicting BYD but almost no effect for PTHT<sub>M</sub> and reduction in GY (Figure 6). The improved  
442 predictive ability for BYD was clearly reflected with the decrease of prediction ability obtained  
443 when season 2017 – 18 was excluded from the training population since most of the lines with  
444 the presence of *Bdv2* were evaluated in that season.

445



## 446 **Discussion**

447

### 448 **Phenotypic Data**

449 The success of breeding for BYD resistance is highly impacted by the ability to precisely  
450 characterize breeding material and disease symptoms. Even though BYD is spread worldwide,  
451 its incidence in a given year depends on several factors such as aphid pressure, planting date, and  
452 environmental conditions (e.g., temperature, rainfall, frost, etc.). In this study, we evaluated  
453 winter wheat advanced breeding lines during five seasons implementing a rigorous field-testing  
454 approach, that ultimately enabled us to consistently have plots contrasting with BYD infection  
455 and uninfected or low incident plots. Moreover, by using large yield-size plots we were able to  
456 calculate the reduction in GY and use this parameter as an estimate of field resistance.

457

458 The expression of BYD symptoms, however, was highly inconsistent during the different  
459 seasons. Seasons 2015-16 and 2016-17 showed the best expression of the disease symptoms,  
460 supported by the wide range of BYD severity between treated and untreated replications (Figure  
461 1). Interestingly, both these seasons were conducted in the same experimental field (Table 1),  
462 suggesting that this location could favor the expression of BYD. Moreover, weather conditions  
463 were variable for all the seasons, suggesting that these had a huge impact on the disease  
464 occurrence. While temperature records were similar for all the seasons, precipitation records did  
465 show some differences. Season 2017 – 18 was dryer than normal, with 34% less precipitation  
466 than the 30 years historical average (1981 – 2010). On the other hand, season 2018-19 was  
467 wetter than normal, with 58% more precipitation than the 30 years historical average (Table S2).

468

### 469 **High-Throughput Phenotyping**

470 Evaluating BYD resistance using visual phenotypic selection can be challenging due to the  
471 complex nature of the disease and rater variability (Poland and Nelson 2011). The use of HTP  
472 with UAS is gaining popularity within breeding programs because it further improves selection  
473 based on classical phenotyping. Accurate phenotyping is crucial for understanding the genetic  
474 basis of quantitative and complex traits like BYD. In this study, we used HTP to complement  
475 the visual BYD scoring. This tool improved our capacity for rapid, non-destructive, and non-  
476 biased evaluation of large field-scale numbers of entries for BYD resistance. We were able to

477 determine strong correlation patterns between visual BYD severity and HTP derived parameters  
478 (Figure S3). However, none of the traits collected with UAS had a common genetic base with  
479 BYD severity (Figure 4 and Figure S4). Disease scoring using HTP is scaling fast among  
480 breeding programs; however, how to effectively use this data remains challenging. Some studies  
481 have shown that data collected with sensor-based tools can be substituted to improve classical  
482 disease visual evaluation (Sankaran *et al.* 2010; Kumar *et al.* 2016; Zheng *et al.* 2018); however,  
483 to the best of our knowledge this study is the first attempt to characterize BYD in wheat using  
484 HTP.

485

### 486 **Genome-Wide Association Analysis**

487 Using GWAS we detected QTLs on chromosomes 5AS, 7AL, and 7DL for BYD severity BLUPs  
488 values. Using GBS tags that mapped to known alien fragments, we confirmed *Bdv2* resistance  
489 gene was located at 7DL, and confirmed that the 7DL QTL was explained by the presence of the  
490 *Bdv2* resistance gene. Even though only 33 wheat lines were positive for the presence of *Bdv2*,  
491 we still had enough power to detect its effect, suggesting that *Bdv2* has a strong effect on BYD  
492 under Kansas field conditions (Figure 5). The associations on chromosome 7AL, observed for  
493 both BYD severity and *Bdv2*, suggest that the SNP markers on the 7AL peak may be miss-  
494 anchored markers that should have mapped to 7DL. The relatively high heritability values  
495 obtained for the untreated replications (Figure 2) allowed us to detect a minor QTL on 5AS.  
496 Marza *et al.* (2005) reported a QTL at 38cM on the short arm of chromosome 5A associated with  
497 yellowing symptoms caused by BYD, and it is possible that this is the same region yet more data  
498 is needed to confirm if these QTLs are the same. The only other study reporting GWAS for BYD  
499 in wheat was able to identify several markers associated with BYD resistance on chromosomes  
500 2A, 2B, 6A, and 7A (Choudhury *et al.* 2019b). However, most of the association were explained  
501 by individual SNP markers, and to date do not have any definitive biological link. GWAS  
502 results for the other traits used in this study did not discover genomic regions associated with the  
503 traits (Figure S4). Taken together, these results suggest that BYD resistance is not controlled by  
504 any large effect loci that could easily be incorporated into the breeding program, thus GS could  
505 be an efficient way to enhance BYD resistance.

506

## 507 **Genomic Selection**

508 We evaluated several different GS models to identify the best approach for predicting BYD  
509 (Figure 6). Overall, we observed some trends including i) incorporating years with consistent  
510 BYD disease data in the training population increased the model predictive ability, ii) predicting  
511 years with high disease pressure is difficult, iii) using major effect QTL, such as *Bdv2*, had  
512 increased prediction performance, suggesting that it is responsible for much of the predictive  
513 power. These results suggest that GS based on G-BLUP with *Bdv2* as fixed effects would lead to  
514 the greatest genetic gain for BYD breeding. Using selected major QTL as a fixed effect to  
515 improve GS models was suggested in a simulation study (Bernardo 2014) and demonstrated with  
516 empirical studies (Rutkoski *et al.* 2014). Nonetheless, using *Bdv2* as a fixed effect in our GS  
517 strategies did not consistently improve the predictive ability for PTH<sub>M</sub> or reduction in GY (Rice  
518 and Lipka 2019). However, there was not a consistent distribution of *Bdv2* allele across the  
519 cohorts. BYD predictions were low compared to other disease (reviewed by Poland and  
520 Rutkoski 2016). However, since this is the first report of GS for BYD resistance in wheat, we do  
521 not have similar results to make better comparisons. BYD has traditionally been reported to  
522 have low  $H^2$  (Tola and Kronstad 1984; Choudhury *et al.*, 2019b) and in this study, even with  
523 well managed plots that often had  $H^2$  approaching 0.8, we still had difficulty reproducing  
524 these results year to year as evidence of the challenge of studying this pathosystem. Moreover,  
525 the correlation between HTP parameters and BYD phenotypes was interesting, but not sufficient  
526 to be useful in combination with GS in the germplasm tested.

527

## 528 **Conclusions**

529 We were able to show that *Bdv2* has a major effect controlling BYD resistance in the KSU  
530 breeding germplasm. Apart from the known *Bdv2* and a potentially novel 5AS region, we did  
531 not find evidence of other regions controlling BYD resistance supporting the hypothesis of  
532 limited resistance available in the current wheat gene pool and the highly polygenic nature of the  
533 trait. Moreover, our study was the first attempt to characterize and improve BYD field-  
534 phenotyping using HTP and apply GS to predict the disease. HTP traits showed strong  
535 correlation patterns with BYD severity, however, none of these parameters shared a common  
536 genetic architecture with BYD severity. The GS predictive ability results that we found in this  
537 study open the door for further improvement and testing GS implementation for breeding for

538 BYD resistance. Continuing the improvement of BYD characterization and the search of new  
539 sources of resistance using species related to wheat, will be crucial to broadening the resistant  
540 genes available to introgress into wheat germplasm.

541

542

### 543 **Data Availability Statement**

544 Supplemental material, including raw and analyzed phenotypic data, genotypic data,  
545 supplementary tables and figures, and basic plot scripts are available at Dryad  
546 doi:10.5061/dryad.ncjsxkswd (temporary link: [https://datadryad.org/stash/share/xkKdr62QYB-](https://datadryad.org/stash/share/xkKdr62QYB-YA93mkzq18_4yFUgwdnvv0uZUyuEHpAI)  
547 [YA93mkzq18\\_4yFUgwdnvv0uZUyuEHpAI](https://datadryad.org/stash/share/xkKdr62QYB-YA93mkzq18_4yFUgwdnvv0uZUyuEHpAI)) and GitHub

548 [https://github.com/umngao/wsm1\\_bdv2](https://github.com/umngao/wsm1_bdv2)

### 549 **Supplementary data description**

550 **Table S1** – List of wheat entries phenotypically evaluated in the study. The table includes the  
551 type of entry (cultivar or breeding line), the season that the entry was evaluated, the result for the  
552 prediction of the presence/absence of the segment carrying the resistance gene *Bdv2*, and the best  
553 linear unbiased predictors (BLUPs) for all the phenotypic traits collected.

554 **Table S2** – Precipitation (inches) during the five field seasons in Riley County, KS, where  
555 Rocky Ford and Ashland Bottoms experimental units are located. Normal temperature is defined  
556 as a 30–year average from 1981 – 2010. Data was obtained from Kansas State University  
557 (<http://climate.k-state.edu/precip/county/>)

558 **Figure S1** – Growth trajectories and adjustment of the non-linear regression model of wheat  
559 lines for A-B) normalized difference vegetation index (NDVI) and C-D) digital plant height  
560 (meters). The data used correspond to season 2016 – 17 phenotypic data. Calendar days is the  
561 number of days starting at January 1, 2017.

562 **Figure S2** – Boxplots showing the phenotypic response of the wheat checks ‘Art’ (susceptible)  
563 and ‘Everest’ (tolerant) for A) barley yellow dwarf (BYD) disease severity (%), B) manual plant  
564 height (PTHT<sub>M</sub>) (m) and C) grain yield (GY) (tons/ha). Adjusted phenotypic values are shown  
565 for both insecticide treatment replications (treated and untreated).

566 **Figure S3** – Scatterplots showing distribution and Pearson’s correlation values for the  
567 phenotypic traits studied during all the field seasons under two insecticide treatments (treated

568 and untreated). A-B) season 2016 – 17, C-D) season 2017 – 18, E-F) season 2018 – 19, and G-H)  
569 season 2019 – 20.

570 **Figure S4** – Manhattan plots showing genome-wide association analysis (GWAS) results for the  
571 phenotypic traits collected during the study.

572

### 573 **Acknowledgements**

574 This material is based upon work supported by Kansas Wheat Commission Award No: B65336  
575 "Integrative and Innovative Approaches to Diminish Barley Yellow Dwarf Epidemics Kansas  
576 Wheat". PS was supported through a U.S. Fulbright-ANII Uruguay Scholarship. Any opinions,  
577 findings, and conclusions or recommendations expressed in this material are those of the  
578 author(s) and do not necessarily reflect the views of industry partners.

579

580

581 **Literature Cited**

- 582 Appels, R., K. Eversole, C. Feuillet, B. Keller, J. Rogers, *et al.*, 2018 Shifting the limits in wheat  
583 research and breeding using a fully annotated reference genome. *Science*, 361(6403)  
584 <http://dx.doi.org/10.1126/science.aar7191>
- 585 Aradottir, G. I., and L. Crespo-Herrera, 2021 Host plant resistance in wheat to barley yellow  
586 dwarf viruses and their aphid vectors: a review. *Current Opinion in Insect Science*, 2021,  
587 45:59–68 <https://doi.org/10.1016/j.cois.2021.01.002>
- 588 Ayala-Navarrete, L., and P. Larkin, 2011 Wheat virus diseases: breeding for resistance and  
589 tolerance. *World wheat book: a history of wheat breeding*, Lavoisier, Paris, 2, 1073-107.
- 590 Ayala, L., M. Henry, M. Van Ginkel, R. Singh, B. Keller, *et al.*, 2002 Identification of QTLs for  
591 BYDV tolerance in bread wheat. *Euphytica*, 128(2), 249-259  
592 <https://doi.org/10.1023/A:1020883414410>
- 593 Ayala, L., M. Van Ginkel, M. Khairallah, B. Keller, and M. Henry, 2001 Expression of  
594 *Thinopyrum intermedium*-derived Barley yellow dwarf virus resistance in elite bread  
595 wheat backgrounds. *Phytopathology*, 91(1), 55–62  
596 <https://doi.org/10.1094/PHTO.2001.91.1.55>
- 597 Banks, P. M., J. L. Davidson, H. Bariana, and P. J. Larkin, 1995 Effects of barley yellow dwarf  
598 virus on the yield of winter wheat. *Australian Journal of Agricultural Research*, 46(5),  
599 935-946
- 600 Barker III, J., N. Zhang, J. Sharon, R. Steeves, X. Wang, *et al.*, 2016 Development of a field-  
601 based high-throughput mobile phenotyping platform. *Computers and Electronics in*  
602 *Agriculture*, 122, 74-85 <https://doi.org/10.1016/j.compag.2016.01.017>
- 603 Bates, D., M. Mächler, B. Bolker, and S. Walker, 2014 Fitting linear mixed-effects models using  
604 lme4. arXiv preprint arXiv:1406.5823
- 605 Bernardo, R., 2014 Genome-wide selection when major genes are known. *Crop Science*, 54(1),  
606 68-75 <https://doi.org/10.2135/cropsci2013.05.0315>
- 607 Bockus, W. W., E. D. De Wolf, and T. Todd, 2016 Management strategies for barley yellow  
608 dwarf on winter wheat in Kansas. *Plant Health Progress*, 17(2), 122–127  
609 <https://doi.org/10.1094/PHP-RS-15-0050>

- 610 Brettell, R. I. S., P. M. Banks, Y. Cauderon, X. Chen, z. Cheng, *et al.*, 1988 A single wheatgrass  
611 chromosome reduces the concentration of barley yellow dwarf virus in wheat. *Annals of*  
612 *Applied Biology*, 113(3), 599–603 <https://doi.org/10.1111/j.1744-7348.1988.tb03337.x>
- 613 Choudhury, S., H. Hu, Y. Fan, P. Larkin, M. Hayden, *et al.*, 2019a Identification of new QTL  
614 contributing to barley yellow dwarf virus-PAV (BYDV-PAV) resistance in wheat. *Plant*  
615 *Disease*, 103(11), 2798–2803 <https://doi.org/10.1094/PDIS-02-19-0271-RE>
- 616 Choudhury, S., P. Larkin, H. Meinke, M. D. Hasanuzzaman, P. Johnson, and M. Zhou, 2019b  
617 Barley yellow dwarf virus infection affects physiology, morphology, grain yield and flour  
618 pasting properties of wheat. *Crop and Pasture Science*, 70(1), 16-25  
619 <https://doi.org/10.1071/CP1836>
- 620 Choudhury, S., P. Larkin, R. Xu, M. Hayden, K. Forrest, *et al.*, 2019c Genome wide association  
621 study reveals novel QTL for barley yellow dwarf virus resistance in wheat. *BMC*  
622 *genomics*, 20(1), 1-8 <https://doi.org/10.1186/s12864-019-6249-1>
- 623 Choudhury, S., H. Hu, H. Meinke, S. Shabala, G. Westmore, *et al.*, 2017 Barley yellow dwarf  
624 viruses: infection mechanisms and breeding strategies. *Euphytica*, Vol. 213, pp. 1–22  
625 <https://doi.org/10.1007/s10681-017-1955-8>
- 626 Cisar, G., C. M. Brown, and H. Jedlinski, 1982 Diallel analyses for tolerance in winter wheat to  
627 the barley yellow dwarf virus 1. *Crop Science*, 22(2), 328-333
- 628 Comeau, A., and S. Haber, 2002 Breeding for BYDV tolerance in wheat as a basis for a multiple  
629 stress tolerance strategy. *Barley Yellow Dwarf Disease: Recent Advances and Future*  
630 *Strategies*, 82
- 631 Crain, J., S. Mondal, J. Rutkoski, R. P. Singh, and J. Poland, 2018 Combining High-Throughput  
632 Phenotyping and Genomic Information to Increase Prediction and Selection Accuracy in  
633 Wheat Breeding. *The Plant Genome*, 11(1), 170043  
634 <https://doi.org/10.3835/plantgenome2017.05.0043>
- 635 D'arcy, C. J., 1995 Symptomatology and host range of barley yellow dwarf. *Barley yellow*  
636 *dwarf*, 40, 9-28
- 637 Endelman, J. B., 2011 Ridge Regression and Other Kernels for Genomic Selection with R  
638 Package rrBLUP. *The Plant Genome*, 4(3), 250–255.  
639 <https://doi.org/10.3835/plantgenome2011.08.0024>

- 640 Foresman, B. J., R. E. Oliver, E. W. Jackson, S. Chao, M. P. Arruda, *et al.*, 2016 Genome-wide  
641 association mapping of barley yellow dwarf virus tolerance in spring oat (*Avena sativa*  
642 L.). PloS one, 11(5), e0155376 <https://doi.org/10.1371/journal.pone.0155376>
- 643 Fox, J., and S. Weisberg, 2011 Nonlinear regression and nonlinear least squares in R. In: J. Fox  
644 and S. Weisberg, An R companion to applied regression. 2nd ed. SAGE Publications, Los  
645 Angeles, CA
- 646 Gao, L., D. H. Koo, P. Juliana, T. Rife, D. Singh, *et al.*, 2021 The *Aegilops ventricosa* 2N<sup>v</sup> S  
647 segment in bread wheat: cytology, genomics, and breeding. Theoretical and Applied  
648 Genetics, 134(2), 529-542. <https://doi.org/10.1007/s00122-020-03712-y>
- 649 Gaunce, G. M., and W. W. Bockus, 2015 Estimating Yield Losses Due to Barley Yellow Dwarf  
650 on Winter Wheat in Kansas Using Disease Phenotypic Data. Plant Health Progress,  
651 16(1), 1–6 <https://doi.org/10.1094/php-rs-14-0039>
- 652 Girvin, J., R. J. Whitworth, L. M. A. Rojas, and C. M. Smith, 2017 Resistance of select winter  
653 wheat (*Triticum aestivum*) cultivars to *Rhopalosiphum padi* (Hemiptera: *Aphididae*).  
654 Journal of Economic Entomology, 110(4), 1886–1889 <https://doi.org/10.1093/jee/tox164>
- 655 Glaubitz, J. C., T. M. Casstevens, F. Lu, J. Harriman, R. Elshire, *et al.*, 2014 TASSEL-GBS: A  
656 High-Capacity Genotyping by Sequencing Analysis Pipeline. PLoS ONE, 9(2), e90346  
657 <https://doi.org/10.1371/journal.pone.0090346>
- 658 Haghghattalab, A., L. G. Pérez, S. Mondal, D. Singh, D. Schinostock, *et al.*, 2016 Application of  
659 unmanned aerial systems for high throughput phenotyping of large wheat breeding  
660 nurseries. Plant Methods, 12(1), 1–15 <https://doi.org/10.1186/s13007-016-0134-6>
- 661 Hollandbeck, G. F., E. DeWolf, and T. Todd, 2019 Kansas cooperative plant disease survey  
662 report. Preliminary 2019 Kansas wheat disease loss estimates. October 2, 2019  
663 [https://agriculture.ks.gov/divisionsprograms/plant-protect-weed-control/reports-and-](https://agriculture.ks.gov/divisionsprograms/plant-protect-weed-control/reports-and-publications)  
664 [publications](https://agriculture.ks.gov/divisionsprograms/plant-protect-weed-control/reports-and-publications)
- 665 Jahier, J., F. Chain, D. Barloy, A. M. Tanguy, J. Lemoine J, *et al.*, 2009 Effect of combining two  
666 genes for partial resistance to Barley yellow dwarf virus-PAV (BYDV- PAV) derived  
667 from *Thinopyrum intermedium* in wheat. Plant Pathol 2009, 58:807-814  
668 <https://doi.org/10.1111/j.1365-3059.2009.02084.x>



- 669 Jarošová, J., E. Beoni, and J. K. Kundu, 2016 Barley yellow dwarf virus resistance in cereals:  
670 Approaches, strategies, and prospects. *Field Crops Research*, 198, 200–214  
671 <https://doi.org/10.1016/j.fcr.2016.08.030>
- 672 Jensen, S. G., and J. W. Van Sambeek, 1972 Differential Effects of Barley Yellow Dwarf Virus  
673 on the Physiology of Tissues of Hard Red Spring Wheat. *Phytopathology*, 62(2), 290  
674 <https://doi.org/10.1094/phyto-62-290>
- 675 Kumar, S., M. S. Röder, R. P. Singh, S. Kumar, R. Chand, *et al.*, 2016 Mapping of spot blotch  
676 disease resistance using NDVI as a substitute to visual observation in wheat (*Triticum*  
677 *aestivum* L.). *Molecular Breeding*, 36(7), 1–11 [https://doi.org/10.1007/s11032-016-0515-](https://doi.org/10.1007/s11032-016-0515-6)  
678 [6](https://doi.org/10.1007/s11032-016-0515-6)
- 679 Larkin, P. J., P. M. Banks, E. S. Lagudah, R. Appels, C. Xiao, *et al.*, 1995 Disomic *Thinopyrum*  
680 *intermedium* addition lines in wheat with barley yellow dwarf virus resistance and with  
681 rust resistances. *Genome*, 38(2), 385–394 <https://doi.org/10.1139/g95-050>
- 682 Lin, Z. S., Z. F. Cui, X. Y. Zeng, Y. Z. Ma, Z. Y. Zhang, *et al.*, 2007 Analysis of wheat-  
683 *Thinopyrum intermedium* derivatives with BYDV-resistance: Analysis of wheat-  
684 *Th.intermedium* derivatives. *Euphytica*, 158(1–2), 109–118  
685 <https://doi.org/10.1007/s10681-007-9435-1>
- 686 Lipka, A. E., F. Tian, Q. Wang, J. Peiffer, M. Li, *et al.*, 2012 GAPIT: genome association and  
687 prediction integrated tool. *Bioinformatics*, 28(18), 2397–2399  
688 <https://doi.org/10.1093/bioinformatics/bts444>
- 689 Marza, F., G. H. Bai, B. F. Carver, and W. C. Zhou, 2005 Quantitative trait loci for yield and  
690 related traits in the wheat population Ning7840× Clark. *Theoretical and Applied*  
691 *Genetics*, 112(4), 688–698 <https://doi.org/10.1007/s00122-005-0172-3>
- 692 Meuwissen, T. H., B. J. Hayes, and M. E. Goddard, 2001 Prediction of total genetic value using  
693 genome-wide dense marker maps. *Genetics*, 157(4), 1819–1829  
694 <https://doi.org/10.1093/genetics/157.4.1819>
- 695 Miller, W. A., and L. Rasochová, 1997 Barley yellow dwarf viruses. *Annual Review of*  
696 *Phytopathology*, Vol. 35, pp. 167–190 <https://doi.org/10.1146/annurev.phyto.35.1.167>
- 697 Mondal, S., J. E. Rutkoski, G. Velu, P. K. Singh, L. A. Crespo-Herrera, *et al.*, 2016 Harnessing  
698 diversity in wheat to enhance grain yield, climate resilience, disease and insect pest

- 699 resistance and nutrition through conventional and modern breeding approaches. *Frontiers*  
700 *in plant science*, 7, 991 <https://doi.org/10.3389/fpls.2016.00991>
- 701 Perry, K. L., F. L. Kolb, B. Sammons, C. Lawson, G. Cisar, *et al.*, 2000 Yield effects of Barley  
702 yellow dwarf virus in soft red winter wheat. *Phytopathology*, 90(9), 1043–1048  
703 <https://doi.org/10.1094/PHYTO.2000.90.9.1043>
- 704 Peiris, K. H., R. L. Bowden, T. C. Todd, W. W. Bockus, M. A. Davis, *et al.*, 2019 Effects of  
705 barley yellow dwarf disease on wheat grain quality traits. *Cereal Chemistry*, 96(4), 754–  
706 764 <https://doi.org/10.1002/cche.10177>
- 707 Pinheiro, J., D. Bates, S. DebRoy, and D. Sarkar, 2015 R Core Team. 2015. *nlme*: linear  
708 and nonlinear mixed effects models. R package version 3.1-120. R package version, 3-1.
- 709 Poland, J., 2015 Breeding-assisted genomics. *Current Opinion in Plant Biology*, Vol. 24, pp.  
710 119–124 <https://doi.org/10.1016/j.pbi.2015.02.009>
- 711 Poland, J. A., and R. J. Nelson, 2011 In the eye of the beholder: The effect of rater variability  
712 and different rating scales on QTL mapping. *Phytopathology*, 101(2), 290–298  
713 <https://doi.org/10.1094/PHYTO-03-10-0087>
- 714 Poland, J. A., P. J. Brown, M. E. Sorrells, and J. L. Jannink, 2012 Development of high-density  
715 genetic maps for barley and wheat using a novel two-enzyme genotyping-by-sequencing  
716 approach. *PloS one*, 7(2), e32253 <https://doi.org/10.1371/journal.pone.0032253>
- 717 Poland, J., and J. Rutkoski, 2016 Advances and Challenges in Genomic Selection for Disease  
718 Resistance. *Annual Review of Phytopathology*, 54(1), 79–98  
719 <https://doi.org/10.1146/annurev-phyto-080615-100056>
- 720 Qualset, C. O., J. C. Williams, M. A. Topcu, and H. E. Vogt, 1973 The barley yellow-dwarf  
721 virus in wheat: importance, sources of resistance, and heritability. In *Proceedings, Fourth*  
722 *International Wheat Genetics Symposium, Columbia, Missouri* (pp. 465-470)
- 723 Rice, B., and A. E. Lipka, 2019 Evaluation of RR-BLUP genomic selection models that  
724 incorporate peak genome-wide association study signals in maize and sorghum. *Plant*  
725 *Genome* 12:180052 <https://doi.org/10.3835/plantgenome2018.07.0052>
- 726 Riedell, W. E., R. W. Kieckhefer, M. A. C. Langham, L. S. and Hesler, 2003 Root and Shoot  
727 Responses to Bird Cherry-Oat Aphids and Barley yellow dwarf virus in Spring Wheat.  
728 *Crop Science*, 43(4), 1380–1386 <https://doi.org/10.2135/cropsci2003.1380>

- 729 Rife, T. W., and J. A. Poland, 2014 Field Book: An Open-Source Application for Field Data  
730 Collection on Android. *Crop Science*, 54(4), 1624–1627  
731 <https://doi.org/10.2135/cropsci2013.08.0579>
- 732 Rouse, J. W., R. H. Haas, J. A. Schell, and D. W. Deering, 1974 Monitoring vegetation systems  
733 in the Great Plains with ERTS. NASA special publication, 351(1974), 309
- 734 Rutkoski, J. E., J. A. Poland, R. P. Singh, J. Huerta-Espino, S. Bhavani, *et al.*, 2014 Genomic  
735 Selection for Quantitative Adult Plant Stem Rust Resistance in Wheat. *The Plant*  
736 *Genome*, 7(3) <https://doi.org/10.3835/plantgenome2014.02.0006>
- 737 Sankaran, S., A. Mishra, R. Ehsani, and C. Davis, 2010 A review of advanced techniques for  
738 detecting plant diseases. *Computers and Electronics in Agriculture*, 72(1), 1–13  
739 <https://doi.org/10.1016/j.compag.2010.02.007>
- 740 Savary, S., L. Willocquet, S. J. Pethybridge, P. Esker, N. McRoberts, *et al.*, 2019 The global  
741 burden of pathogens and pests on major food crops. *Nature ecology and evolution*, 3(3),  
742 430–439 <https://doi.org/10.1038/s41559-018-0793-y>
- 743 Shah, S. J. A., M. Bashir, and N. Manzoor, 2012 A review on barley yellow dwarf virus. In *Crop*  
744 *Production for Agricultural Improvement*, Vol. 9789400741164, pp. 747–782  
745 [https://doi.org/10.1007/978-94-007-4116-4\\_29](https://doi.org/10.1007/978-94-007-4116-4_29)
- 746 Sharma, H., H. Ohm, L. Goulart, R. Lister, R. Appels, *et al.*, 1995 Introgression and  
747 characterization of barley yellow dwarf virus resistance from *Thinopyrum intermedium*  
748 into wheat. *Genome*, 38(2), 406–413 <https://doi.org/10.1139/g95-052>
- 749 Singh, R. P., P.A. Burnett, M. Albarran, and S. Rajaram, 1993 *Bdv1*: a gene for tolerance to  
750 barley yellow dwarf virus in bread wheats. *Crop Science*, 33(2), 231–234  
751 <https://doi.org/10.2135/cropsci1993.0011183X003300020002x>
- 752 Singh, D., X. Wang, U. Kumar, L. Gao, M. Noor, *et al.*, 2019 High-throughput phenotyping  
753 enabled genetic dissection of crop lodging in wheat. *Frontiers in plant science*, 10, 394  
754 <https://doi.org/10.3389/fpls.2019.00394>
- 755 Tola, J. E., and W. E. Kronstad, 1984 The genetics of resistance to barley yellow dwarf virus in  
756 wheat. In *Barley Yellow Dwarf Workshop, Mexico, DF (Mexico)*, 6–8 Dec 1983.  
757 CIMMYT

- 758 Walls, J., E. Rajotte, and C. Rosa, 2019 The past, present, and future of barley yellow dwarf  
759 management. *Agriculture (Switzerland)*, 9(1), 1–16  
760 <https://doi.org/10.3390/agriculture9010023>
- 761 Wang, X., P. Silva, N. M. Bello, D. Singh, B. Evers, *et al.*, 2020 Improved Accuracy of High-  
762 Throughput Phenotyping from Unmanned Aerial Systems by Extracting Traits Directly  
763 from Orthorectified Images. *Frontiers in Plant Science*, 11, 1616  
764 <https://doi.org/10.3389/fpls.2020.587093>
- 765 Wang, X., D. Singh, S. Marla, G. Morris, and J. Poland, 2018 Field-based high-throughput  
766 phenotyping of plant height in sorghum using different sensing technologies. *Plant*  
767 *Methods*, 14(1), 53 <https://doi.org/10.1186/s13007-018-0324-5>
- 768 Zadoks, J. C., T. T. Chang, and C. F. Konzak, 1974 A decimal code for the growth stages of  
769 cereals. *Weed research* 14.6 (1974): 415-421
- 770 Yin, LiLin, 2020 CMplot: Circle Manhattan Plot. R package version 3.6.2 [https://CRAN.R-](https://CRAN.R-project.org/package=CMplot)  
771 [project.org/package=CMplot](https://CRAN.R-project.org/package=CMplot)
- 772 Yu, J., G. Pressoir, W. H. Briggs, I. V. Bi, M. Yamasaki, *et al.*, 2006 A unified mixed-model  
773 method for association mapping that accounts for multiple levels of relatedness. *Nature*  
774 *genetics*, 38(2), 203-208 <https://doi.org/10.1038/ng1702>
- 775 Zhang, Z., Z. Lin, and Z. Xin, 2009 Research progress in BYDV resistance genes derived from  
776 wheat and its wild relatives. *Journal of Genetics and Genomics*, 36(9), 567–573  
777 [https://doi.org/10.1016/S1673-8527\(08\)60148-4](https://doi.org/10.1016/S1673-8527(08)60148-4)
- 778 Zheng, Q., W. Huang, X. Cui, Y. Dong, Y. Shi, *et al.*, 2018 Identification of Wheat Yellow Rust  
779 Using Optimal Three-Band Spectral Indices in Different Growth Stages. *Sensors*, 19(1),  
780 35 <https://doi.org/10.3390/s19010035>
- 781

**Table 1** – Field experimental details for the five wheat nurseries

| Season            | 2015 – 2016                                                                                         | 2016 – 2017   | 2017 – 2018                    | 2018 – 2019   | 2019 – 2020   |
|-------------------|-----------------------------------------------------------------------------------------------------|---------------|--------------------------------|---------------|---------------|
| Location          | Rocky Ford farm                                                                                     |               | Ashland Bottoms farm           |               |               |
|                   | 39°13'45.60" N, 96°34'41.21" W                                                                      |               | 39°07'53.76" N, 96°37'05.20" W |               |               |
| Planting Date     | Sep. 17, 2015                                                                                       | Sep. 12, 2016 | Sep. 19, 2017                  | Sep. 17, 2018 | Sep. 17, 2019 |
| Number of Entries | 68                                                                                                  | 52            | 81                             | 81            | 107           |
| Number of Plots   | 504                                                                                                 | 360           | 400                            | 392           | 684           |
| Field Design      | split-plot with insecticide treatment as major factor effect and wheat genotype as secondary factor |               |                                |               |               |
| Replications      | 3                                                                                                   | 3             | 2                              | 2             | 2             |
| Plot Size         | 6 rows plots - 1.5 m × 2.4 m                                                                        |               |                                |               |               |
| BYD Evaluation    | April 28, 2016                                                                                      | May 12, 2017  | May 19, 2018                   | May 13, 2019  | May 19, 2020  |
| Harvesting Date   | June 20, 2016                                                                                       | June 19, 2017 | June 23, 2018                  | June 28, 2019 | June 25, 2020 |

**Table 2** – Dates of high-throughput phenotypic data collection and details of image acquisition in the five wheat nurseries screened for BYD, Kansas, USA (2015-2020).

| Season            | 2015 – 2016                                        | 2016 – 2017            | 2017 – 2018         | 2018 – 2019 | 2019 – 2020 |            |
|-------------------|----------------------------------------------------|------------------------|---------------------|-------------|-------------|------------|
| UAS Platform      | PheMU                                              |                        | DJI Matrice 100     |             |             |            |
| Imaging Sensor    | multiple digital single-lens reflex (DSLR) cameras |                        | MicaSense RedEdge-M |             |             |            |
| Flight/Pass speed | 0.3–0.5 m/s                                        |                        | 2 m/s               |             |             |            |
| Flight Dates      |                                                    |                        |                     | 2019-04-01  |             |            |
|                   |                                                    |                        |                     | 2019-04-09  |             |            |
|                   |                                                    | 2017-03-28             |                     | 2019-04-19  |             |            |
|                   |                                                    | 2017-04-13             | 2018-03-30          | 2019-04-26  | 2020-03-20  |            |
|                   |                                                    | 2017-05-01             | 2018-04-04          | 2019-05-02  | 2020-04-11  |            |
|                   |                                                    | 2016-03-31             | 2017-05-09          | 2018-04-12  | 2019-05-10  | 2020-04-23 |
|                   |                                                    | 2016-04-07             | 2017-05-21          | 2018-04-19  | 2019-05-15  | 2020-05-03 |
|                   |                                                    | 2016-04-14             | 2017-05-23          | 2018-04-23  | 2019-05-23  | 2020-05-19 |
|                   |                                                    | 2016-05-06             | 2017-05-30          | 2018-05-16  | 2019-05-31  | 2020-06-05 |
|                   |                                                    |                        | 2017-06-05          | 2018-06-13  | 2019-06-05  | 2020-06-11 |
|                   |                                                    |                        | 2017-06-13          |             | 2019-06-12  |            |
|                   |                                                    |                        |                     |             | 2019-06-17  |            |
|                   | Flight/Pass altitude                               | 0.5 m above the canopy |                     | 20 m AGL    |             |            |
|                   | In-Air Flight Duration                             | NA                     |                     | ~ 11–14 min |             |            |

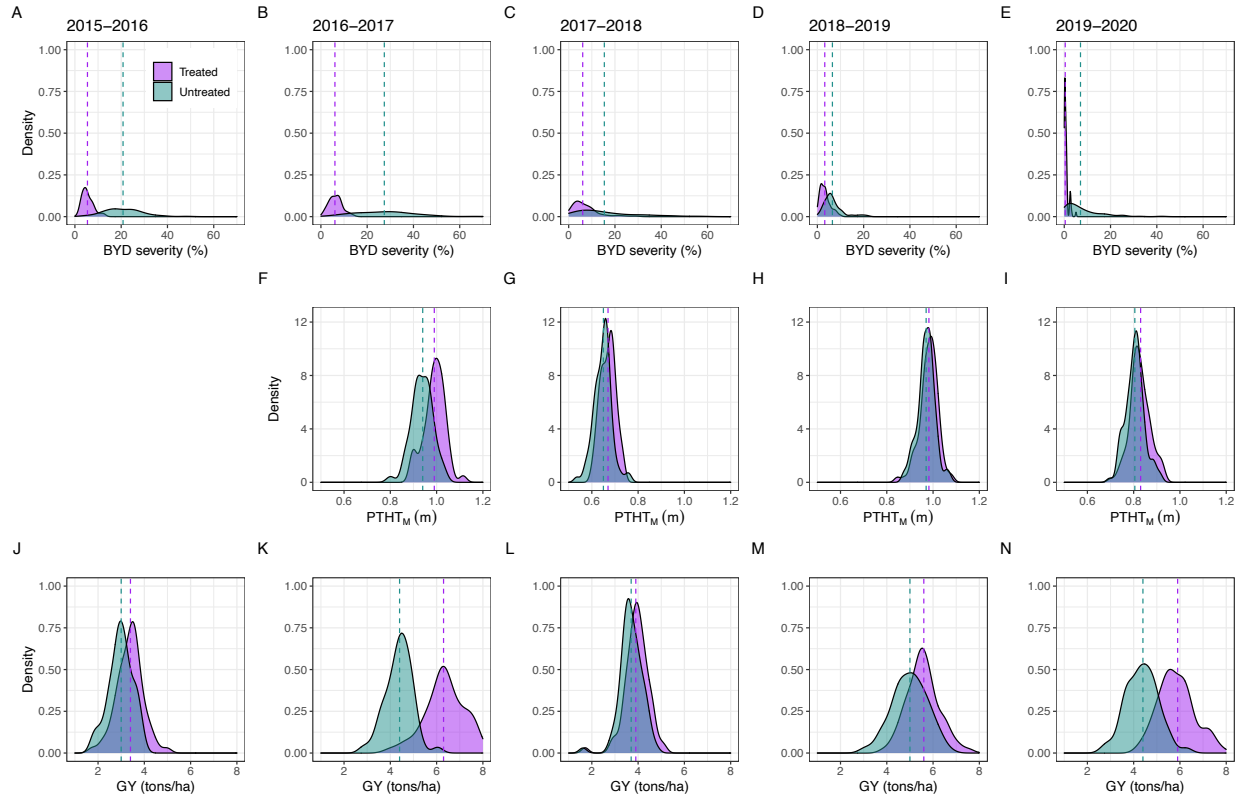

**Figure 1** Adjusted phenotypic values for the traits collected manually for five different field seasons (2015-2016 to 2019-2020). A-E) barley yellow dwarf (BYD) severity (%) characterized as the typical visual symptoms of yellowing/purpling on leaves using a 0 – 100% visual scale, F-I) manual plant height/stunting (PTHT<sub>M</sub>) (meters), note that the trait was not recorded for the 2015 – 2016 season, and J-N) grain yield (GY) (tons/ha). Insecticide-treated and untreated replications are represented by purple and green, respectively. The dashed line represents the mean value for the trait in each treatment

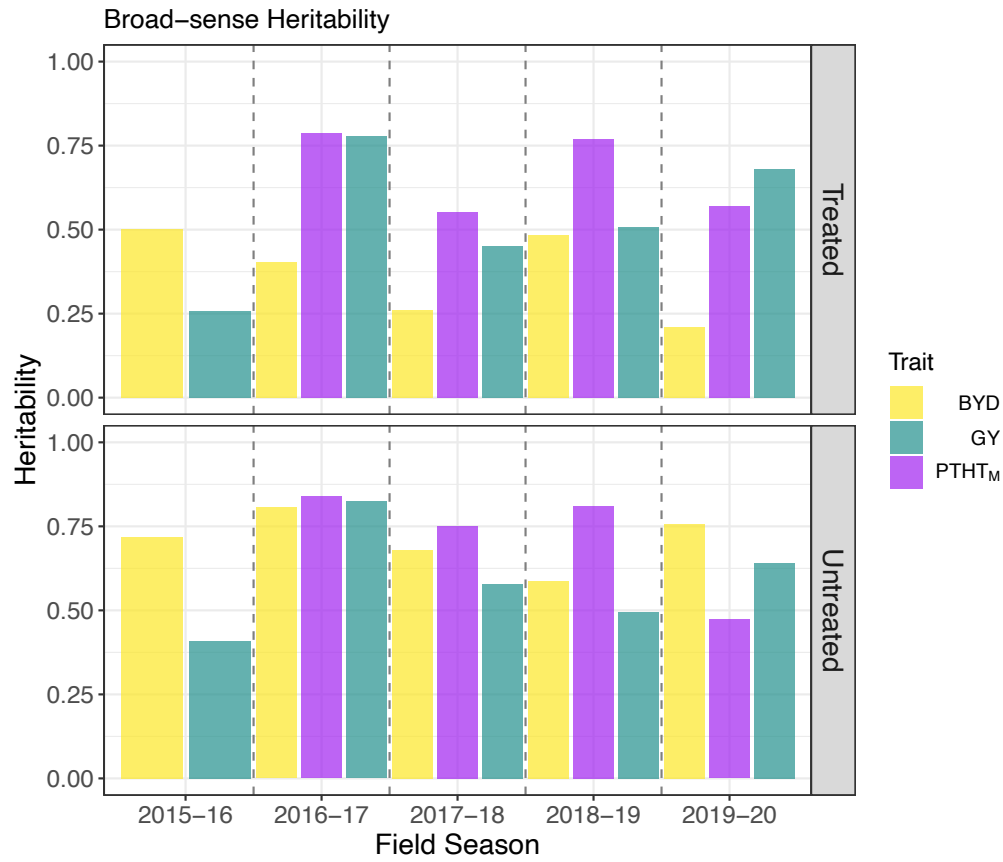

**Figure 2** Broad-sense heritability of wheat phenotypic traits collected manually, including visual barley yellow dwarf (BYD) score, plant height (PTHT<sub>M</sub>) and grain yield (GY) during five different field seasons under two insecticide treatments.



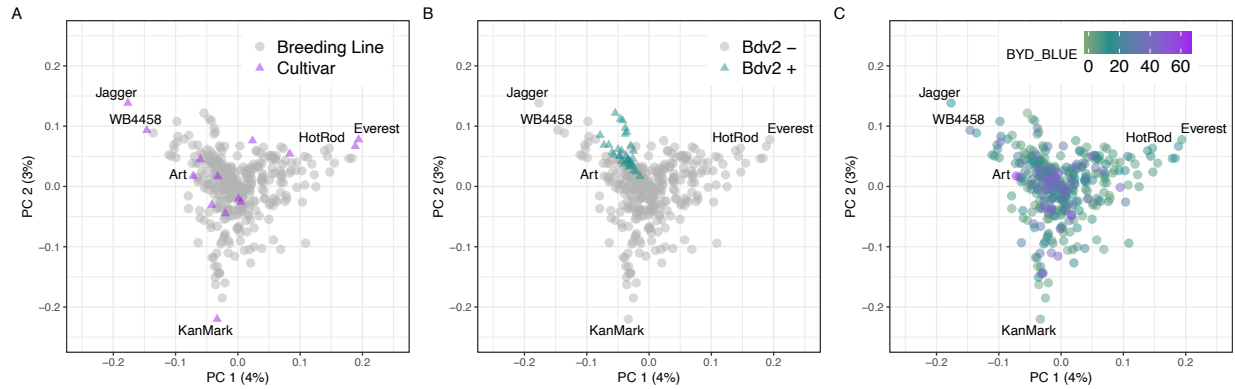

**Figure 3** Scatterplot of the first two principal component axis, made from principal component analysis on the marker matrix,  $n = 357$  wheat lines, markers = 29,480. Each data point represents an individual wheat line that is color-coded by A) breeding status, B) prediction of *Bdv2* presence/absence, and C) adjusted mean for BYD severity (BYD BLUE) scored visually. Total variance explained by each principal component (PC) is listed on the axis.

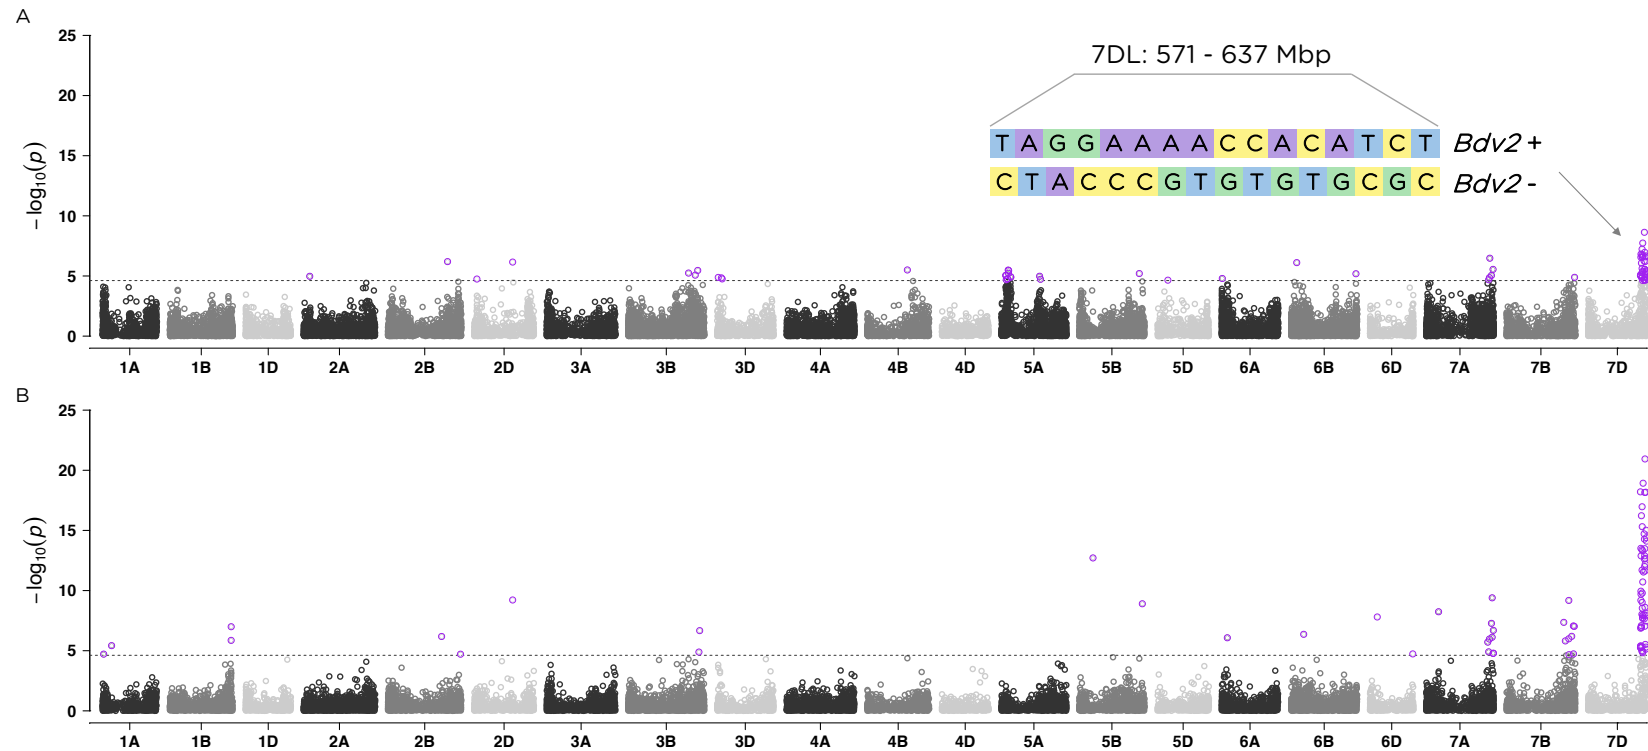

**Figure 4** Manhattan plots showing the marker-trait associations using 346 wheat accessions and 29,480 SNP markers obtained with genotyping-by-sequencing (GBS) for A) BYD severity and B) presence/absence of *Bdv2* resistance gene. The 21 labeled wheat chromosomes with physical positions are on the x-axis and y-axis is the  $-\log_{10}$  of the p-value for each SNP marker. Horizontal dashed lines represent the false discovery rate threshold at 0.01 level and data points highlighted in purple and above the threshold represent SNPs significantly associated with the trait. In panel a, the length of the region and the haplotypes defined by the significant SNP markers is displayed.

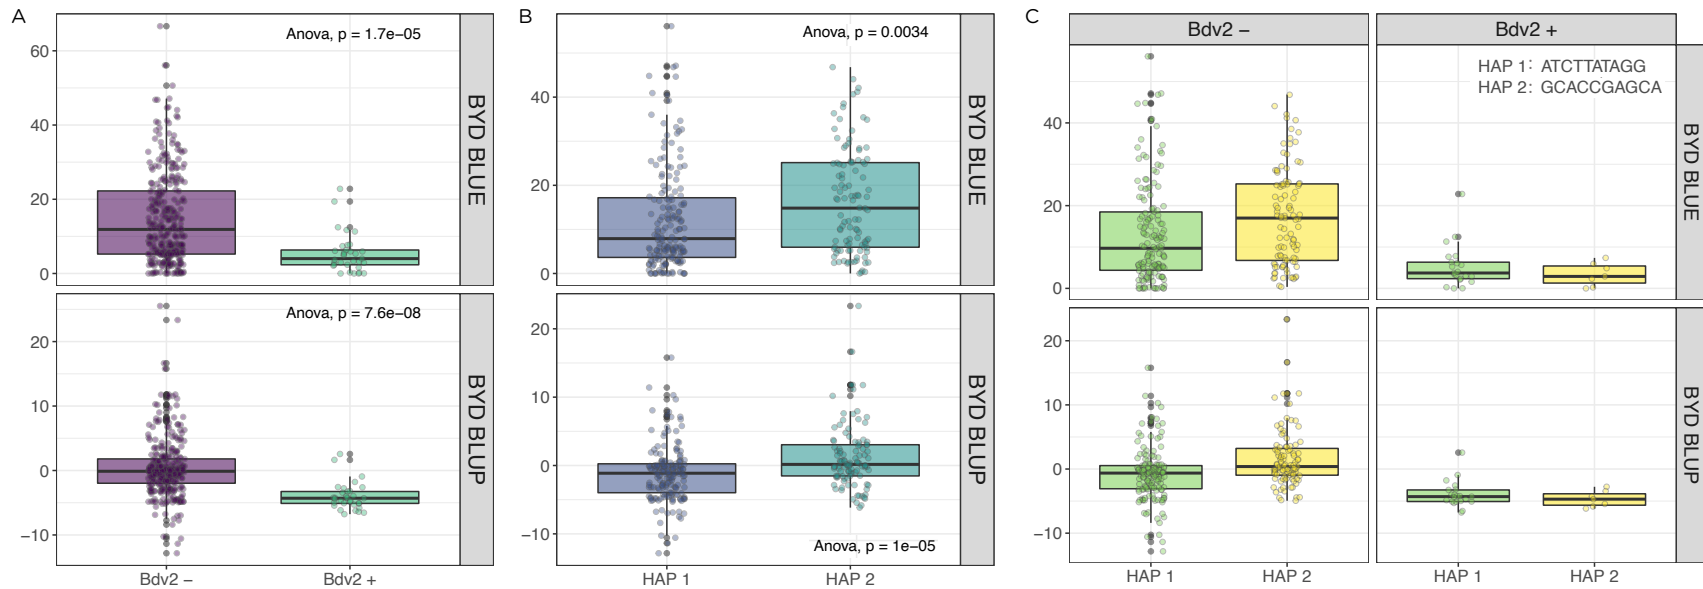

**Figure 5** Measurement of barley yellow dwarf disease severity in wheat based on certain haplotype effects were panel A) represents the translocation segment carrying the resistance gene Bdv2, B) displays the two haplotypes for the significant region on chromosome 5AS, and C) shows the combination of Bdv2 resistance gene and 5A haplotype. Boxplots showing the significant reduction of BYD disease severity by averaging the phenotypic best linear unbiased estimated (BLUE) or best linear unbiased predicted (BLUP) values for the lines.

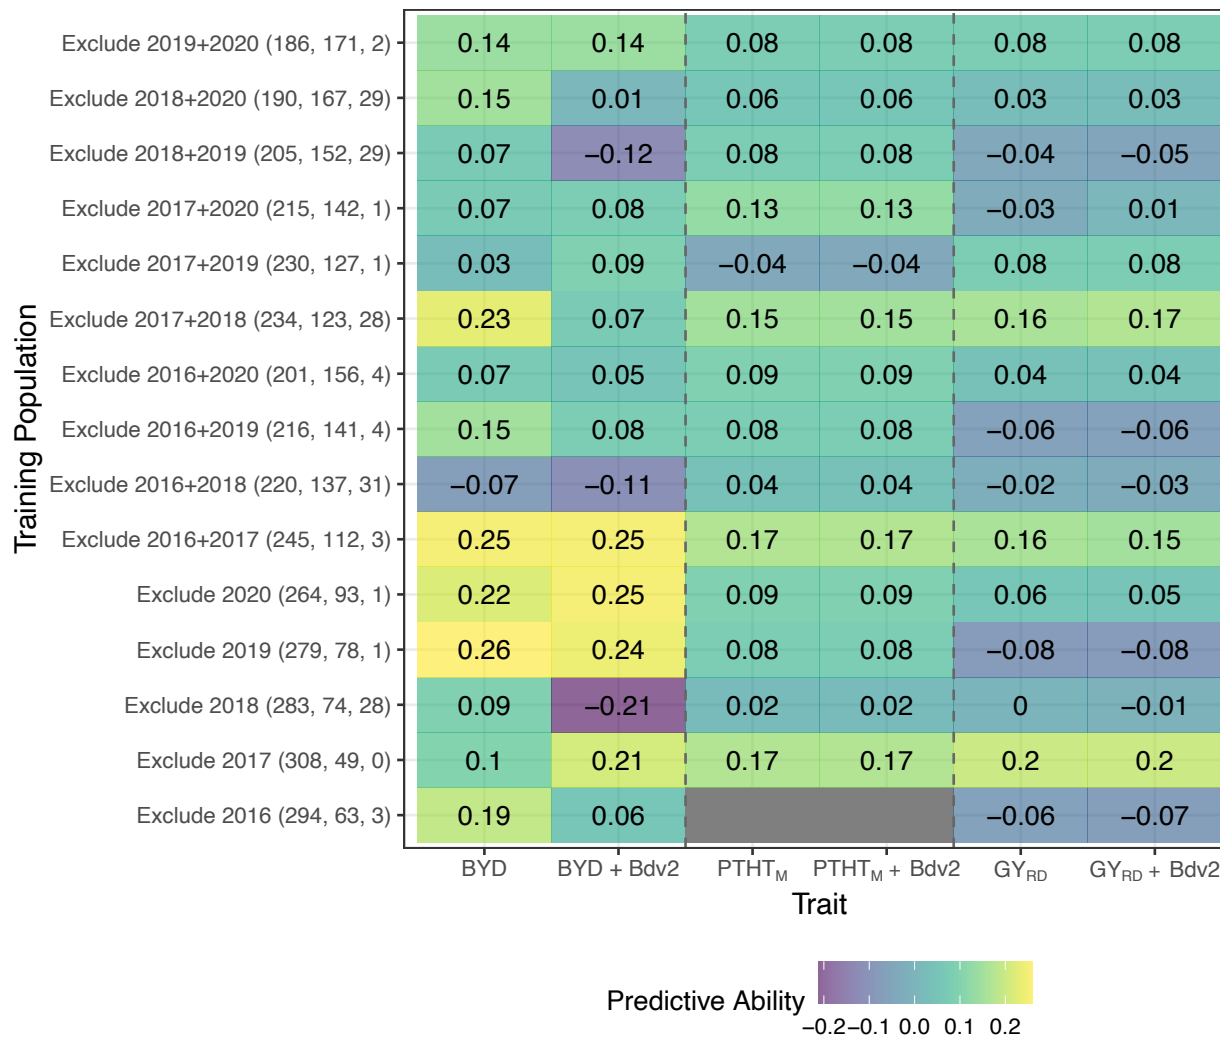

**Figure 6** Genomic selection model predictive ability where each column represents one trait, and each row shows the conformation of the training population including size of training and testing population and number of lines with presence of *Bdv2* resistance gene. The value in each cell represents the predictive ability which is the correlation between the GS predicted value (GBLUP) and the phenotypic best linear unbiased predictor (BLUP).
